# Supplementary material for: Healthiness of Food and Beverages for Sale at Two Public Hospitals in New South Wales, Australia
Source: MDPI journal article supplement (doi:10.3390/nu10020216), 2018-02-15
Supplement: s1 [file s1]

# Food Audit Assumptions

## 1 Background

The Food Audit Assumptions outline the categorisation of food and drink items (Everyday, Everyday non-compliant, Occasional, Occasional non-compliant) when there is a lack of information provided by the food vendor or the item is not included in the Food and Drink Guidelines. These assumptions were developed to ensure consistency in food audits in health facilities.

Assumptions have been made accordingly for when an item where the product information is unknown (see Table 2: Lack of information from food vendor).

**The assumptions are only to be used if no further information can be collected from food vendors and a consensus as to which category the product fits within cannot be reached by the team.**

## 2 Assumptions

The following rule applies when menu items contain Occasional products.

- If a menu item contains the following Occasional ingredients, it automatically becomes **Occasional**. (Crumbed/coated meat, processed meat (except ham), hot chips)
  - For example, an egg and bacon roll, or tempura sushi would be assessed against Occasional criteria
  - However, confectionery in an Everyday food or drink does NOT make it Occasional, but makes it non-compliant and should never be sold.

The tables in the pages that follow outline the assumptions that are to be made to assist in determining the category of menu items.

Table 1 - Menu assessment key

Table 2 - Assumptions to use in the lack of information from food vendors

**Table 1: Menu Analysis Key**

| Abbreviation | Category                 |
|--------------|--------------------------|
| E            | Everyday                 |
| ENC          | Everyday non-compliant   |
| O            | Occasional               |
| ONC          | Occasional non-compliant |
| HSR          | Health Star Rating       |

**Table 2: Assumptions to use in the lack of information from food vendors**

| Menu item                                                                                             | Freshly prepared on site/package                                              | Assumed category | Reasoning                                                                                                                                                                                                                                                                         |
|-------------------------------------------------------------------------------------------------------|-------------------------------------------------------------------------------|------------------|-----------------------------------------------------------------------------------------------------------------------------------------------------------------------------------------------------------------------------------------------------------------------------------|
| <b>Sandwiches/wraps/rolls/toasties</b>                                                                |                                                                               |                  |                                                                                                                                                                                                                                                                                   |
| Fillings – lean meat, tuna, salmon, roast chicken, reduced-fat cheese, salad/vegetables, egg, falafel | Freshly prepared/ packaged                                                    | <b>E</b>         | Assume fillings are Everyday and have $\geq 3.5$ health star rating (HSR)                                                                                                                                                                                                         |
| Fillings – ham, bacon, sausages, coated/crumbed meat (e.g. Chicken schnitzel)                         | Packaged                                                                      | <b>O</b>         | Assume fillings are Occasional and have $\geq 3.5$ HSR<br>For portion sizes assume: <ul style="list-style-type: none"> <li>Processed meat (e.g. ham, bacon) &lt;60g.</li> <li>Sausages &lt; max 60g.</li> <li>Crumbed and coated meat (e.g. chicken tenders) &lt;140g.</li> </ul> |
| <b>Bread</b>                                                                                          |                                                                               |                  |                                                                                                                                                                                                                                                                                   |
| Bread e.g. white, wholemeal, multi-grain, rye                                                         | Packaged                                                                      | <b>E</b>         | Assume all bread has $\geq 3.5$ HSR therefore Everyday                                                                                                                                                                                                                            |
| Margarine on bread                                                                                    | Packaged                                                                      | <b>E</b>         | Assume margarine has $\geq 3.5$ HSR                                                                                                                                                                                                                                               |
| <b>Sushi and Salads</b>                                                                               |                                                                               |                  |                                                                                                                                                                                                                                                                                   |
| Sushi                                                                                                 | Freshly prepared or packaged with lean meat e.g. tuna rolls, teriyaki chicken | <b>E</b>         | Assume the following fillings are Everyday - Tuna, salmon, fresh chicken breast, avocado, vegetables or tofu.                                                                                                                                                                     |
|                                                                                                       | Freshly prepared or packaged with crumbed meat                                | <b>O</b>         | Assume the following fillings are Occasional - crumbed meats, processed meats<br><b>Note:</b> aligns with salad and processed meat assumption but not covered in guidelines                                                                                                       |
| Salads containing 'non crumbed meat'                                                                  | Freshly prepared/ packaged                                                    | <b>E</b>         | Assume all salad ingredients are Everyday have $\geq 3.5$ HSR and/or on the 'buy' section of the Essential shopping list                                                                                                                                                          |
| Salads containing crumbed meat eg. Chicken tender salad                                               | Freshly prepared/ packaged                                                    | <b>O</b>         | Assume Occasional if salad contains Occasional ingredients such as crumbed or processed meats ( $\geq 3.5$ HSR).<br>Assume Salad ingredients are Everyday fresh unpackaged or Everyday packaged with $\geq 3.5$ HSR and/or on the 'buy' section of the Essential Shopping List.   |
| Caesar salad                                                                                          | Freshly prepared/ packaged                                                    | <b>E</b>         | Assume Caesar salad contains Everyday packaged ingredients that have $\geq 3.5$ HSR.                                                                                                                                                                                              |
| <b>Burgers</b>                                                                                        |                                                                               |                  |                                                                                                                                                                                                                                                                                   |
| Burgers (uncoated meat, tofu, fish, beef, chicken, vegetable, lentil)                                 | Freshly prepared/ packaged                                                    | <b>E</b>         | Assume burger patties are made with Everyday ingredients (lean meat, vegetables or lentils) or packaged ingredients which have $\geq 3.5$ HSR and/or foods from the Essential Shopping List.<br>If packaged burger patty, assume portion size < max                               |
| Burgers (crumbed or coated meat/falafel)                                                              | Freshly prepared/ packaged                                                    | <b>O</b>         | Assume burger patties has $\geq 3.5$ HSR                                                                                                                                                                                                                                          |
| <b>Meat/fish/poultry and alternatives</b>                                                             |                                                                               |                  |                                                                                                                                                                                                                                                                                   |
| Processed meat e.g. Ham, devon, salami,                                                               | Packaged                                                                      | <b>O</b>         | Check portion size and HSR label on FoodSwitch database                                                                                                                                                                                                                           |

|                                                    |                                                           |          |                                                                                                                                                                                                                                                                                    |
|----------------------------------------------------|-----------------------------------------------------------|----------|------------------------------------------------------------------------------------------------------------------------------------------------------------------------------------------------------------------------------------------------------------------------------------|
| bacon, frankfurters, hot dogs                      |                                                           |          |                                                                                                                                                                                                                                                                                    |
| Tuna, salmon, roast beef, skinless chicken, turkey | Packaged                                                  | <b>E</b> | Assume all lean meats are Everyday and have a $\geq 3.5$ HSR                                                                                                                                                                                                                       |
| <b>Hot food</b>                                    |                                                           |          |                                                                                                                                                                                                                                                                                    |
| Pasta                                              | Freshly prepared (tomato, mince based or cheese base)     | <b>E</b> | Assume pasta is made with fresh Everyday ingredients or packaged ingredients which have a $\geq 3.5$ HSR and/or foods from the Essential Shopping List.<br><br>Assume pasta portion size is < max                                                                                  |
|                                                    | Packaged (tomato, mince based or cheese base)             | <b>E</b> | Check portion size and HSR label on FoodSwitch database                                                                                                                                                                                                                            |
|                                                    | Freshly prepared with processed meat e.g. carbonara pasta | <b>O</b> | Assume occasional items e.g. processed meat have $\geq 3.5$ HSR<br><br>Assume pasta portion size is < max                                                                                                                                                                          |
|                                                    | Packaged pasta with processed meat                        | <b>O</b> | Check portion size and HSR label on FoodSwitch database                                                                                                                                                                                                                            |
| Pizza (does not contain processed meats)           | Freshly prepared                                          | <b>E</b> | Assume pizza is made on thin crust with fresh unpackaged ingredients or packaged ingredients which have $\geq 3.5$ HSR and/or foods from the Essential Shopping List<br>Assume pizza portion size is < max                                                                         |
|                                                    | Packaged                                                  | <b>E</b> | Check portion size and HSR label on FoodSwitch database                                                                                                                                                                                                                            |
| Pizza (contains processed meats)                   | Freshly prepared                                          | <b>O</b> | Assume pizza is made with fresh Everyday ingredients or packaged ingredients which have $\geq 3.5$ HSR and/or foods from the Essential Shopping List<br>Assume portion size of processed meat is < max portion size, e.g. ham should be <60g<br>Assume pizza portion size is < max |
|                                                    | Packaged                                                  | <b>O</b> | Check portion size and HSR label on FoodSwitch database                                                                                                                                                                                                                            |
| Soup                                               | Freshly prepared                                          | <b>E</b> | Assume soup is made with fresh Everyday ingredients or packaged ingredients which have $\geq 3.5$ HSR and/or foods from the Essential Shopping List. Assume lean meats are used.                                                                                                   |
|                                                    | Packaged                                                  | <b>E</b> | Check portion size and HSR label on FoodSwitch database                                                                                                                                                                                                                            |
| Jacket Potato                                      | Freshly prepared                                          | <b>E</b> | Assume jacket potato is made with fresh Everyday ingredients or packaged ingredients which have $\geq 3.5$ HSR and/or foods from the Essential Shopping List<br>Assume portion < max                                                                                               |
| Hot chips                                          | Packaged                                                  | <b>O</b> | Check portion size and HSR label on FoodSwitch database                                                                                                                                                                                                                            |
| Garlic bread                                       | Freshly prepared                                          | <b>O</b> | Assume appropriate portion size (half English muffin or pita, 1 slice of bread, 75g).<br>Assume garlic bread is made with fresh Everyday ingredients or packaged ingredients which have $\geq 3.5$ HSR and/or foods from the Essential Shopping List                               |

|                                                                                                                                                                  |                                                        |                                                                        |                                                                                                                                                                                                                                                      |
|------------------------------------------------------------------------------------------------------------------------------------------------------------------|--------------------------------------------------------|------------------------------------------------------------------------|------------------------------------------------------------------------------------------------------------------------------------------------------------------------------------------------------------------------------------------------------|
|                                                                                                                                                                  | Packaged                                               | <b>O</b>                                                               | Check portion size and HSR label on FoodSwitch database                                                                                                                                                                                              |
| Pies (meat pie, vegetable pie)                                                                                                                                   | Freshly prepared                                       | <b>O</b>                                                               | If products portion size is <180g for pastry-top pies and <250g if potato-top                                                                                                                                                                        |
| Pies (meat pie, vegetable pie)                                                                                                                                   | Freshly prepared                                       | <b>ONC</b>                                                             | If products portion size is >180g for pastry-top pies and >250g if potato-top OR has a HSR of <3.5 stars                                                                                                                                             |
| Savoury pastry e.g. Sausage Roll                                                                                                                                 | Freshly prepared                                       | <b>O</b>                                                               | if savoury pastry portion size < 120g                                                                                                                                                                                                                |
| Savoury pastry e.g. Sausage Roll                                                                                                                                 | Freshly prepared                                       | <b>ONC</b>                                                             | If savoury pastry portion size > 120g OR has a <3.5 HSR                                                                                                                                                                                              |
| Hot food products with no ingredient information e.g. This could include but not limited to macaroni and cheese, lasagne, meat balls, fried rice, quiche, nachos | Freshly prepared                                       | <b>Assign according to appropriate category in guidelines (E or O)</b> | If no ingredient list available, assume home-made products are made with fresh Everyday ingredients or packaged ingredients which have $\geq 3.5$ HSR and/or foods from the Essential Shopping List.<br><br>Assume portion size requirements are met |
|                                                                                                                                                                  | Packaged                                               | <b>Assign according to appropriate category in guidelines (E or O)</b> | Check portion size and HSR label on FoodSwitch database                                                                                                                                                                                              |
| Salads/sandwiches or hot prepared foods                                                                                                                          | Freshly prepared (with visible Occasional ingredients) | <b>ONC</b>                                                             | Ingredient list or visible use of :<br>-dressings made from cream, sour cream, crème fraîche<br>-chocolate nut spread and other nut spread <3.5 HSR<br>-sauces made from cream or butter<br>-regular coconut milk and cream                          |
| <b>Snacks</b>                                                                                                                                                    |                                                        |                                                                        |                                                                                                                                                                                                                                                      |
| Fruit Cup                                                                                                                                                        | Freshly prepared                                       | <b>E</b>                                                               | Assume fruit cup is made with Everyday fresh fruit with no toppings added.                                                                                                                                                                           |
|                                                                                                                                                                  | Packaged                                               | <b>E</b>                                                               | Check portion size and HSR label on FoodSwitch database                                                                                                                                                                                              |
| Corn cobette                                                                                                                                                     | Freshly prepared/<br>packaged                          | <b>E</b>                                                               | Assume corn cobette is an Everyday vegetable and is not prepared with salt or butter.                                                                                                                                                                |
| Dips -vegetable based, yoghurt                                                                                                                                   | Freshly prepared                                       | <b>E</b>                                                               | If vegetable based: assume made with fresh Everyday vegetables and/or ingredients from the Essential Shopping List.<br><br>If dairy based: assume products used have a $\geq 3.5$ HSR                                                                |
|                                                                                                                                                                  | Packaged                                               | <b>E</b>                                                               | Check HSR label on FoodSwitch database                                                                                                                                                                                                               |
| Dips -cream cheese or sour cream based                                                                                                                           | Freshly prepared                                       | <b>ENC</b>                                                             | Assume product has a <3.5 HSR                                                                                                                                                                                                                        |
|                                                                                                                                                                  | Packaged                                               | <b>ENC</b>                                                             | Check HSR label on FoodSwitch database                                                                                                                                                                                                               |
| Pikelets and pancakes                                                                                                                                            | Freshly prepared                                       | <b>E</b>                                                               | Assume no toppings are added and/or toppings are from the "Buy" section of the Essentials shopping list and applied according to preparation instructions e.g. thin spread of jam                                                                    |
|                                                                                                                                                                  | Packaged                                               | <b>E</b>                                                               | Check HSR label on FoodSwitch database                                                                                                                                                                                                               |

|                                                                                  |                                                                    |            |                                                                                           |
|----------------------------------------------------------------------------------|--------------------------------------------------------------------|------------|-------------------------------------------------------------------------------------------|
| Popcorn                                                                          | Freshly prepared                                                   | <b>E</b>   | Assume popcorn is air-popped, plain (contains no salt and butter)                         |
|                                                                                  | Plain/ packaged                                                    | <b>E</b>   | Check portion size and HSR label on FoodSwitch database, if >50g, then <b>ONC</b>         |
|                                                                                  | Flavoured/ microwaved                                              | <b>O</b>   | Check portion size and HSR label on FoodSwitch database                                   |
| Salty snacks                                                                     | Packaged                                                           | <b>O</b>   | Check HSR label on FoodSwitch database                                                    |
|                                                                                  | Packaged, >50g                                                     | <b>ONC</b> | Over allowed portion size.                                                                |
|                                                                                  | Packaged, with added confectionery (yoghurt coating, choc)         | <b>ONC</b> | Occasional ingredients added                                                              |
| Muffins                                                                          | Freshly prepared                                                   | <b>O</b>   | Estimate size, assume no added Occasional ingredients                                     |
|                                                                                  | Freshly prepared, >80g                                             | <b>ONC</b> | Over allowed portion size                                                                 |
|                                                                                  | Packaged                                                           | <b>ONC</b> | Assume ingredients have a HSR of <3.5. Also check size.                                   |
| Muffin (with added confectionery: choc, icing)                                   | Freshly prepared                                                   | <b>ONC</b> | Added confectionery<br>Assume choc muffin is <3.5 stars                                   |
|                                                                                  | Packaged                                                           | <b>ONC</b> | Assume has <3.5 HSR                                                                       |
| Homemade snacks such as cakes, sweet pastries                                    | Freshly prepared                                                   | <b>O</b>   | Assume item meets portion size, if ambiguous, assume ingredients have a HSR of $\geq 3.5$ |
|                                                                                  | Freshly prepared, >80g                                             | <b>ONC</b> | Over allowed portion size                                                                 |
|                                                                                  | Freshly prepared, with added confectionery: choc, icing            | <b>ONC</b> | Added confectionery<br>Assume <3.5 stars                                                  |
| Homemade sweet biscuits                                                          | Freshly prepared                                                   | <b>O</b>   | Assume item meets portion size, if ambiguous, assume ingredients have a $\geq 3.5$ HSR    |
|                                                                                  | Freshly prepared, >50g                                             | <b>ONC</b> | Over allowed portion size                                                                 |
|                                                                                  | Freshly prepared, with added confectionery: choc, icing            | <b>ONC</b> | Added confectionery<br>Assume <3.5 stars                                                  |
| Muesli bars                                                                      | Packaged                                                           | <b>E</b>   | Check HSR label on FoodSwitch database                                                    |
|                                                                                  | Packaged, >50g                                                     | <b>ENC</b> | Over allowed portion size                                                                 |
|                                                                                  | Packaged, with added confectionery (icing, choc, yoghurt coatings) | <b>O</b>   | Added confectionery<br>Assume <3.5 stars                                                  |
| Confectionery                                                                    | Packaged                                                           | <b>O</b>   | Assume confectionery is <3.5 stars                                                        |
|                                                                                  | Packaged, if >50g                                                  | <b>ONC</b> | Over allowed portion size                                                                 |
| Jelly                                                                            | Freshly prepared                                                   | <b>O</b>   | Assume jelly is <3.5 stars                                                                |
|                                                                                  | Packaged                                                           | <b>O</b>   | Assume jelly is <3.5 stars                                                                |
| Jelly sticks, tubes, wobbli or pouch are 'juice jellies therefore confectionary' | Confectionary                                                      | <b>O</b>   | Assume sticks, tubes, wobbli or pouch are 'juice jellies therefore confectionary'         |
| <b>Dairy foods</b>                                                               |                                                                    |            |                                                                                           |

|                                                                    |                                    |                  |                                                                                                                                                                                                        |
|--------------------------------------------------------------------|------------------------------------|------------------|--------------------------------------------------------------------------------------------------------------------------------------------------------------------------------------------------------|
| Yoghurt, cheese                                                    | Packaged                           | <b>E</b>         | Check HSR label on FoodSwitch database                                                                                                                                                                 |
|                                                                    | Packaged, with added confectionery | <b>O</b>         | Assume all have a <3.5 HSR                                                                                                                                                                             |
| <b>Drinks</b>                                                      |                                    |                  |                                                                                                                                                                                                        |
| Water                                                              | Packaged                           | <b>E</b>         | Assume has a $\geq 3.5$ HSR                                                                                                                                                                            |
| Plain milk e.g. cow and plant based milks                          | Packaged                           | <b>E</b>         | Assume plain milk has a $\geq 3.5$ HSR.                                                                                                                                                                |
| Flavoured milk                                                     | Freshly prepared                   | <b>E</b>         | If ambiguous, assume portion size < max and no more than 1 level tablespoon of milk flavouring or powder e.g. Milo, hot chocolate                                                                      |
|                                                                    | Packaged                           | <b>E</b>         | If ambiguous, assume portion size < max and has a HSR of 3.5 stars and above                                                                                                                           |
| Milkshakes/ smoothies                                              | Freshly prepared                   | <b>E</b>         | If ambiguous, assume portion size < max and is made with ingredients that have a $\geq 3.5$ HSR                                                                                                        |
|                                                                    | Packaged                           | <b>E</b>         | If ambiguous, assume portion size < max and is made with ingredients that have a $\geq 3.5$ HSR                                                                                                        |
| Juice (poppers, pop-tops, frozen juice/ frozen crushed ice drinks) | Packaged                           | <b>E</b>         | Check HSR label on FoodSwitch database                                                                                                                                                                 |
| Diet soft drinks                                                   | Packaged                           | <b>O</b>         | Note portion size                                                                                                                                                                                      |
| <b>Frozen ice snacks</b>                                           |                                    |                  |                                                                                                                                                                                                        |
| Ice block                                                          | Packaged                           | <b>O</b>         | Assume portion size <125mL and has a HSR of <3.5 stars                                                                                                                                                 |
| Slushies                                                           | Packaged                           | <b>E</b>         | If ambiguous, assume 99% fruit juice, portion size < max and HSR of 3.5 stars and above                                                                                                                |
| Ice cream                                                          | Packaged                           | <b>O</b>         | If ambiguous, assume portion size >125mL and has a HSR of <3.5 stars                                                                                                                                   |
| Milky bites (frozen milk)                                          | Freshly prepared                   | <b>E</b>         | If ambiguous, assume this is low fat flavoured milk with HSR of 3.5 stars and above                                                                                                                    |
| Frozen yoghurt                                                     | Packaged                           | <b>O</b>         | If ambiguous, assume portion size >125mL and has a HSR of 3.5 stars and above.                                                                                                                         |
| Ice cups e.g. Made with cordial                                    | Freshly prepared                   | <b>O</b>         | If portion size of ice cups > max (125g) and not made with 99% fruit juice.                                                                                                                            |
| <b>Condiments - spreads and sauces</b>                             |                                    |                  |                                                                                                                                                                                                        |
| Sauces – tomato, BBQ and soy sauce (pg.18)                         | Packaged                           | <b>Compliant</b> | Assume all sauces are on the ‘buy section’ of the shopping list and soy and satay sauces are salt reduced<br><b>Note:</b> whilst this is the assumption most canteens will not sell salt reduced sauce |
| Margarine (pg. 17)                                                 | Packaged                           | <b>Compliant</b> | Assume margarine has a $\geq 3.5$ HSR.                                                                                                                                                                 |
