# Supplementary material for: Healthiness of Food and Beverages for Sale at Two Public Hospitals in New South Wales, Australia
Source: MDPI journal article supplement (doi:10.3390/nu10020216), 2018-02-15
Supplement: s1 [file s1]

## Food Environment Audit Tool

|                                                      |                                                                             |                                                                             |                             |
|------------------------------------------------------|-----------------------------------------------------------------------------|-----------------------------------------------------------------------------|-----------------------------|
| <b>Health Facility:</b>                              |                                                                             | <b>Location:</b>                                                            |                             |
| <b>Date audit completed</b>                          | <b>Time:</b>                                                                |                                                                             | <b>Initials of auditor:</b> |
| <b>Type of outlet /name</b>                          |                                                                             |                                                                             |                             |
| <b>Point of Sale</b><br>(describe what is available) | 1) Checkout Areas                                                           | 2) Countertops                                                              |                             |
| <b>Marketing</b>                                     | <b>Number of promotional posters at outlet</b> (describe what is displayed) | <b>Meal deals</b> (list any discounted meals that include occasional foods) |                             |

| Category        | List of Foods and Drinks                                                                                                                                                                                                                 | #<br>types | Comments |
|-----------------|------------------------------------------------------------------------------------------------------------------------------------------------------------------------------------------------------------------------------------------|------------|----------|
| Everyday Snacks | <b>Canned tuna/chicken</b> (plain, spring water, including packaged with plain crackers/ salads/beans/pasta. Does not include processed chicken roll/loaf)                                                                               |            |          |
|                 | <b>Cheese</b>                                                                                                                                                                                                                            |            |          |
|                 | <b>Custard (no added confectionary)</b>                                                                                                                                                                                                  |            |          |
|                 | <b>Dips</b> (hommus, tzatziki, veg-based) NOT cream-cheese or sour-cream-based dips)                                                                                                                                                     |            |          |
|                 | <b>Dried fruit</b> (non-coated) (<50g)                                                                                                                                                                                                   |            |          |
|                 | <b>Fruit</b> (if canned, in juice,not in syrup)                                                                                                                                                                                          |            |          |
|                 | <b>Unsalted nuts, seeds, popcorn, legume snacks</b> (including mixed with plain dried fruit)                                                                                                                                             |            |          |
|                 | <b>Lightly salted nuts and seeds (&lt;50g)</b> (no sweet coratings)                                                                                                                                                                      |            |          |
|                 | <b>Lightly salted and flavoured popcorn (&lt;50g)</b> (including lightly salted microwave varieties), not coated with caramel, toffee, carob, chocolate)                                                                                 |            |          |
|                 | <b>Lightly salted legume snacks (&lt;50g)</b> (wasabi peas, roasted and salted chickpeas)                                                                                                                                                |            |          |
|                 | <b>Muesli and Snack bars (&lt;50g)</b> (e.g. cereal-based bars, fresh or dried fruit-based bars, nut bars, protein bars and breakfast bars<br>No added yoghurt or confectionery e.g. chocolate, chocolate chips, marshmallow, sprinkles) |            |          |
|                 | <b>Savory biscuits/crackers/crispbread</b> (preferably whole grain)                                                                                                                                                                      |            |          |
|                 | <b>Scones, pikelets, pancakes</b> (no added confectionary)                                                                                                                                                                               |            |          |

|                     |                                                                                                                                                                                                                                                                                                                             |  |                                  |
|---------------------|-----------------------------------------------------------------------------------------------------------------------------------------------------------------------------------------------------------------------------------------------------------------------------------------------------------------------------|--|----------------------------------|
|                     | <b>Vegetables &amp; Legumes (lentils/beans)</b>                                                                                                                                                                                                                                                                             |  |                                  |
|                     | <b>Yoghurt</b> (greek, natural, plain, flavoured, soy, excludes coconut-milk based) No Added confectionary.                                                                                                                                                                                                                 |  |                                  |
| Occasional Snacks   | <b>Cakes &amp; sweet pastries</b> (muffins, banana bread, brownie, carrot cake, choc cake, fruit cake, cupcake, croissants) ( <b>&lt;80g</b> )                                                                                                                                                                              |  |                                  |
|                     | <b>Confectionery</b> (choc, choc spreads, boiled sweets, fruit jellies, icing, yoghurt type confectionary or yoghurt coating) ( <b>&lt;50g</b> )                                                                                                                                                                            |  |                                  |
|                     | <b>Desserts</b> (mousse, cheesecake, puddings, rice pudding, custard, jelly) ( <b>&lt;100g</b> )                                                                                                                                                                                                                            |  |                                  |
|                     | <b>Ice cream, frozen yoghurt, ice blocks (&lt;85ml)</b>                                                                                                                                                                                                                                                                     |  |                                  |
|                     | <b>Salty snacks</b> (e.g. chips and crisps (potato, corn, grain and wholegrain-style, vegetable), flavoured baked savoury biscuits, extruded snacks (cheese, bacon, BBQ flavoured puffed snacks, extruded vegetable snacks), coated nuts, soy crisps, flavoured rice snacks, noodle snacks and pretzels) ( <b>&lt;50g</b> ) |  |                                  |
|                     | <b>Sweet biscuits (&lt;50g)</b>                                                                                                                                                                                                                                                                                             |  |                                  |
| Everyday Cold Meals | <b>Frittata</b> (no pastry) (everyday fillings)                                                                                                                                                                                                                                                                             |  |                                  |
|                     | <b>Salads</b> (garden, pasta, bean, couscous, quinoa, egg, potato-based, coleslaw, tabouleh)                                                                                                                                                                                                                                |  |                                  |
|                     | <b>Sandwiches/wraps/rolls</b> (everyday fillings, any type bread)                                                                                                                                                                                                                                                           |  | *lean ham is Everyday ingredient |
|                     | <b>Sushi/rice paper rolls</b> - everyday fillings (tuna, avocado, salmon, veg, tofu, chicken, uncoated lean meats) (NO deep fried/tempura)                                                                                                                                                                                  |  |                                  |

|                       |                                                                                                                                                                                                                                                                                                |  |  |
|-----------------------|------------------------------------------------------------------------------------------------------------------------------------------------------------------------------------------------------------------------------------------------------------------------------------------------|--|--|
| Occasional Cold Meals | <b>Sandwiches/wraps/rolls/salads/sushi/frittata</b> (occasional fillings eg bacon, ham, salami, chorizo, prosciutto, coated/crumbed meat eg chicken schnitzels, coated/crumbled falafel, vegetable tempura, food with pastry) ( <b>&lt;60g processed meats/&lt;140g crumbed coated meats</b> ) |  |  |
| Everyday Hot Meals    | <b>Dim sum, wontons, steamed buns</b> (not fried)                                                                                                                                                                                                                                              |  |  |
|                       | <b>Pasta</b> (lasagne, spaghetti bolognese, ravioli, macaroni and cheese, pasta bakes, canned spaghetti)                                                                                                                                                                                       |  |  |
|                       | <b>Pizza</b> (Everyday toppings e.g. roast chicken, veg, pineapples, cheese, preferably thin crust,muffin/pita base, and wholemeal)                                                                                                                                                            |  |  |
|                       | <b>Risotto and rice dishes</b> (chicken risotto, mushroom risotto, vegetable risotto, nasi goreng, mexican rice, paella)                                                                                                                                                                       |  |  |
|                       | <b>Indian</b>                                                                                                                                                                                                                                                                                  |  |  |
|                       | <b>Asian – with rice</b>                                                                                                                                                                                                                                                                       |  |  |
|                       | <b>Asian – with noodles</b>                                                                                                                                                                                                                                                                    |  |  |
|                       | <b>Mexican</b> (soft tortillas only)                                                                                                                                                                                                                                                           |  |  |
|                       | <b>Soup</b>                                                                                                                                                                                                                                                                                    |  |  |
|                       | <b>Jacket (baked) Potatoes</b> - everyday toppings (salad, tuna, baked beans, sweetcorn, savoury lean meat)                                                                                                                                                                                    |  |  |
|                       | <b>Burger patties/rissoles/meatballs/falafel/veggie</b> (uncoated)                                                                                                                                                                                                                             |  |  |
|                       | <b>Toasties and open melts</b> (everyday fillings)                                                                                                                                                                                                                                             |  |  |
|                       | <b>Everyday Hot Breakfast</b> (everyday fillings) *lean ham is Everyday, no deep fried food                                                                                                                                                                                                    |  |  |

|                         |                                                                                                                                                                                                                                                                                                                                                                                                                                                                                                                                              |  |  |
|-------------------------|----------------------------------------------------------------------------------------------------------------------------------------------------------------------------------------------------------------------------------------------------------------------------------------------------------------------------------------------------------------------------------------------------------------------------------------------------------------------------------------------------------------------------------------------|--|--|
| Occasional<br>Hot Meals | <b>Hot meals with OCCASIONAL food/fillings (&lt;450g)</b><br>(pizza/pasta/risotto with processed meats such as bacon/prosciutto; meals with crumbed/ coated meat, such as schnitzel meals or crumbed burgers; meals with hot chips/wedges; sausage sizzle or meals with sausages; breakfast or other meals with bacon/sausages/hash browns; nachos or tacos with corn chips or hard taco shells/bowls; jacket potato or burgers with processed meats such as bacon; meals including garlic bread or pastry) *lean ham is Everyday ingredient |  |  |
|                         | <b>Crumbed and coated foods (hot or cold) (&lt;140g)</b>                                                                                                                                                                                                                                                                                                                                                                                                                                                                                     |  |  |
|                         | <b>Garlic bread &amp; cheese/bacon rolls/pull-apart breads (&lt;90g)</b>                                                                                                                                                                                                                                                                                                                                                                                                                                                                     |  |  |
|                         | <b>Hot potato products</b> (chips, hashbrowns, wedges, gems, scallops, potato bakes) (<100g)                                                                                                                                                                                                                                                                                                                                                                                                                                                 |  |  |
|                         | <b>Instant flavoured noodles/ hot noodle cups</b><br>(<75g dry pack weight)                                                                                                                                                                                                                                                                                                                                                                                                                                                                  |  |  |
|                         | <b>Corn chips, hard taco shells/bowls-tacos/nachos/bowls (&lt;50g)</b>                                                                                                                                                                                                                                                                                                                                                                                                                                                                       |  |  |
|                         | <b>Pies (&lt;180g, &lt;250g for potato top)</b>                                                                                                                                                                                                                                                                                                                                                                                                                                                                                              |  |  |
|                         | <b>Processed meat</b> (bacon, chicken roll, pastrami, salami, pepperoni, chorizo, pancetta, prosciutto, mortadella, frankfurts, sausages and hot dogs. Does not include compressed whole muscle-meat products, such as formed chicken-breast, free-flow chicken, formed fish-fillet (<60g)                                                                                                                                                                                                                                                   |  |  |
|                         | <b>Sausage rolls, savoury pastries</b> (sausage rolls, spring rolls, samosas, quiche, filled pastries, cheese&spinach triangles) (<120g)                                                                                                                                                                                                                                                                                                                                                                                                     |  |  |

|                                          |                                                                                                                                                                                                                                                                     |  |  |
|------------------------------------------|---------------------------------------------------------------------------------------------------------------------------------------------------------------------------------------------------------------------------------------------------------------------|--|--|
| Everyday<br>drinks (not<br>in fridges)   | <b>Water</b> (tap, spring, mineral, sparkling) (includes infused with flavouring, fruit/herb essence or fruit juice flavouring up to 4%)                                                                                                                            |  |  |
|                                          | <b>Plain milk, milk alternatives</b>                                                                                                                                                                                                                                |  |  |
|                                          | <b>Tea (leaf/herbal)</b> No added sugars or intense sweeteners                                                                                                                                                                                                      |  |  |
|                                          | <b>Fruit/vegetable juice (including coconut water)</b> (99% fruit or veg) (no added sugar or intense sweeteners) (<400ml)                                                                                                                                           |  |  |
|                                          | <b>Coffee (freshly made)</b> (All espresso, instant, filtered, percolated coffees e.g. coffee made with water and/or milk, latte, cappuccino, mocha, and iced-coffee. May be blended with ice (frappe) or frozen. Preferably reduced fat. (<500ml)                  |  |  |
|                                          | <b>Liquid breakfast drinks/protein drinks (&lt;500ml)</b>                                                                                                                                                                                                           |  |  |
|                                          | <b>Flavoured milk/alternatives</b> (e.g. chocolate flavoured milk, iced-coffee flavoured milk, hot chocolate, iced chocolate, drinking yoghurt. Flavoured milk and milk alternatives served frozen or blended with ice (e.g. frappes) are Everyday drinks. (<500ml) |  |  |
|                                          | <b>Milkshakes/smoothies</b> (fruit based, or milk/milk/alternative-based, no ice-cream/gelato) (<500ml))                                                                                                                                                            |  |  |
| Occasional<br>drinks (not<br>in fridges) | <b>Diet and sugar-free drinks</b> (e.g. diet soft drinks, diet iced teas, diet flavoured mineral waters, diet energy drinks, diet sports waters and sports drinks, diet cordials and no-sugar slushies) (<500ml)                                                    |  |  |
|                                          | <b>Thick shakes/smoothies</b> (w/ ice cream/gelato/sorbet) (<500ml)                                                                                                                                                                                                 |  |  |

## Drinks

|          |                                                                            |                                                                                                                         |
|----------|----------------------------------------------------------------------------|-------------------------------------------------------------------------------------------------------------------------|
| <b>A</b> | Water (still, mineral, lightly flavoured, sparkling plain, no sugar added) | <b>Please list any additional items in the vending machine, and which items were over the appropriate portion size:</b> |
| <b>B</b> | Water (fortified) (eg, Vitamin or Smart Water)                             |                                                                                                                         |
| <b>C</b> | Lightly sparkling water (flavoured)                                        |                                                                                                                         |
| <b>D</b> | Coconut water                                                              |                                                                                                                         |
| <b>E</b> | Milk, plain (or milk alternative)                                          |                                                                                                                         |
| <b>F</b> | Milk, flavoured (<500ml)                                                   |                                                                                                                         |
| <b>G</b> | Fruit/Vegetable Juice (99%) (<400ml)                                       |                                                                                                                         |
| <b>H</b> | Fruit drink                                                                |                                                                                                                         |
| <b>I</b> | Iced Tea                                                                   |                                                                                                                         |
| <b>J</b> | Soft Drinks (non-diet e.g. Cola/Sprite/Lift/Fanta/Deep Spring) (<500ml)    |                                                                                                                         |
| <b>K</b> | Diet soft drinks (e.g. Coca Cola Zero, Coke Life, Sprite Zero) (<500ml)    |                                                                                                                         |
| <b>L</b> | Sports drinks (normal e.g. Powerade Ion)                                   |                                                                                                                         |
| <b>M</b> | Sports drinks (sugar-free)                                                 |                                                                                                                         |
| <b>N</b> | Energy Drinks (normal)                                                     |                                                                                                                         |
| <b>O</b> | Energy Drinks (sugar-free)                                                 |                                                                                                                         |
| <b>P</b> | Protein drinks                                                             |                                                                                                                         |
| <b>Q</b> | Liquid breakfast drinks (<450g)                                            |                                                                                                                         |
| <b>R</b> | Coffee flavoured drink                                                     |                                                                                                                         |

### Fridge One:

Commercial fridge? Yes/No

| Shelf   | Start from Left to Right; Item x Quantity in rows |
|---------|---------------------------------------------------|
| 1 (Top) |                                                   |
| 2       |                                                   |
| 3       |                                                   |
| 4       |                                                   |
| 5       |                                                   |
| 6       |                                                   |

### Fridge Two:

Commercial fridge? Yes/No

| Shelf   | Start from Left to Right ; Item x Quantity in rows |
|---------|----------------------------------------------------|
| 1 (Top) |                                                    |
| 2       |                                                    |
| 3       |                                                    |
| 4       |                                                    |
| 5       |                                                    |
| 6       |                                                    |
