# Supplementary material for: Healthiness of Food and Beverages for Sale at Two Public Hospitals in New South Wales, Australia
Source: Nutrients. 2018 Feb 15;10(2):216. doi: 10.3390/nu10020216 (PMC5852792; doi:10.3390/nu10020216)
Supplement: Supplementary file 1 [file nutrients-10-00216-s001.zip]

Archive with 7 entries (6 files):
- Document_S1(AuditTool).pdf
- __MACOSX/
- __MACOSX/._Document_S1(AuditTool).pdf
- Document_S2(CountingProcedure).pdf
- __MACOSX/._Document_S2(CountingProcedure).pdf
- Document_S3(AuditAssumptions).pdf
- __MACOSX/._Document_S3(AuditAssumptions).pdf
